# Supplementary material for: Understanding the endocrine disruptor and determination of bisphenol A by functional Cu-BTABB-MOF/rGO composite as facile rapid electrochemical sensor: an experimental and DFT investigation
Source: Royal Society of Chemistry journal article supplement (doi:10.1039/d1ay02150h), 2022-01-01
Supplement: d1ay02150h1.pdf [file d1ay02150h1.pdf]

## Supporting Information

# Understanding the Endocrine Disruptor and Determination of Bisphenol A by Functional Cu-BTABB-MOF/rGO Composite as Facile Rapid Electrochemical Sensor: An Experimental and DFT Investigation

Srikanth Ponnada<sup>[a,f]\*</sup>, Demudu Babu Gorle<sup>[b]</sup>, Maryam Sadat Kiai<sup>[c]</sup>, Chikkili Venkateswara Raju<sup>[d]</sup>, Mehrdad Faraji<sup>[e]</sup>, Rakesh K Sharma<sup>[f]\*</sup> & Annapurna Nowduri<sup>[a]\*</sup>

<sup>a</sup>*Department of Engineering Chemistry, Andhra University College of Engineering (A), Andhra University, Visakhapatnam-530003, India.*

<sup>b</sup>*Materials Research Centre, Indian Institute of Science, Bangalore-560012, India.*

<sup>c</sup>*Nano-Science and Nano-Engineering Program, Graduate School of Science, Engineering and Technology, Istanbul Technical University, Istanbul-34469, Turkey.*

<sup>d</sup>*Research Center for Photoenergy Harvesting & Conversion Technology (phct), Department of Energy Materials and Engineering, Dongguk University, Seoul, 04620, Republic of Korea.*

<sup>e</sup>*Department of Micro and Nanotechnology, Graduate School of Science and Engineering, TOBB University of Economics and Technology, Ankara-06530, Turkey.*

<sup>f</sup>*Sustainable Materials and Catalysis Research Laboratory (SMCRL), Department of Chemistry, Indian Institute of Technology Jodhpur, Karwad, Jodhpur-342037, India.*

**Corresponding authors:** [dr.nannapurma@andhrauniversity.edu.in](mailto:dr.nannapurma@andhrauniversity.edu.in)

[rks@iitj.ac.in](mailto:rks@iitj.ac.in)

[koolsreekanth@gmail.com](mailto:koolsreekanth@gmail.com)

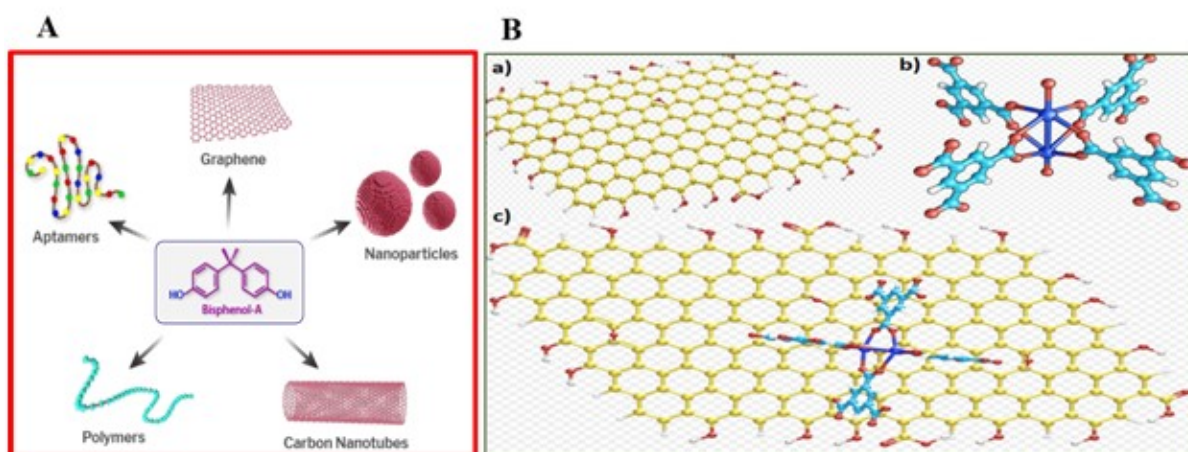

**Figure S1.** (A). Bisphenol-A analysis sensors. (B). Representation of the electrochemical interaction of MOF and Cu-BTABB-MOF on GO and rGO. (a) r-GO, (b) Cu-BTABB-MOF, (c) Cu-BTABB-MOF@ r-GO. Red, Yellow, Gray and Blue colors are Oxygen, Hydrogen, Carbon and Nitrogen, respectively.

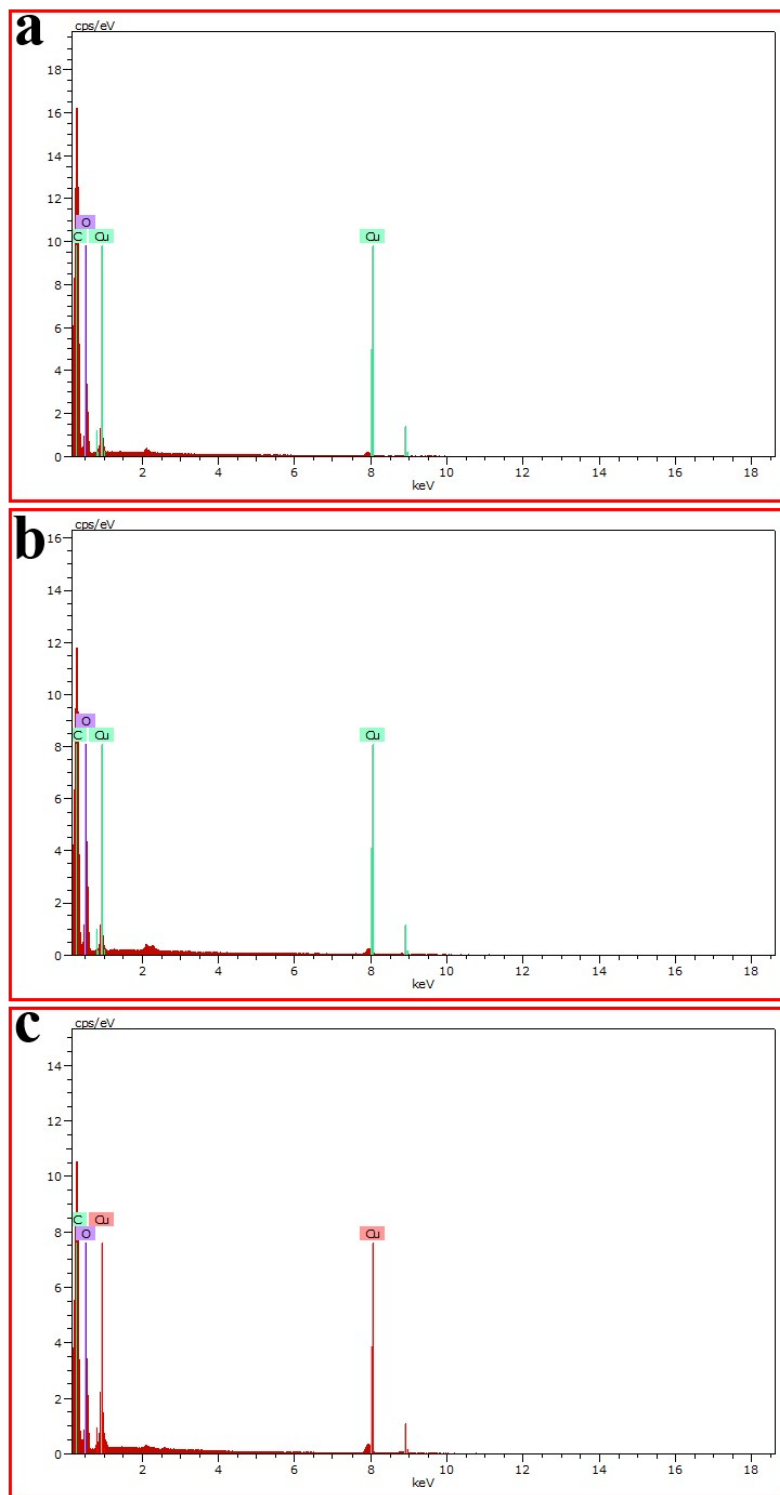

**Figure S2.**EDX spectra of (a) Cu BTABB-MOF, (B) Cu BTABB-MOF/GO, and (c) Cu BTABB-MOF/rGO.

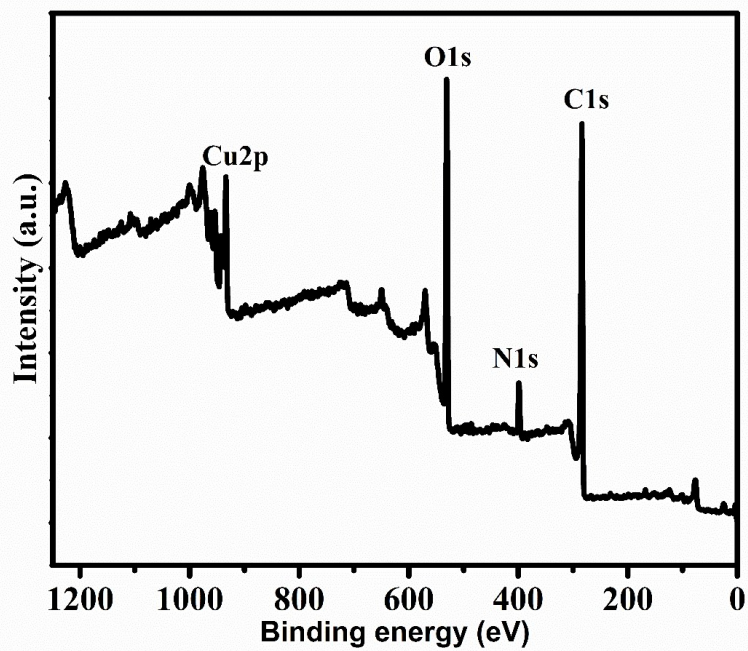

Figure S3. XPS survey spectra of Cu BTABB-MOF/rGO.

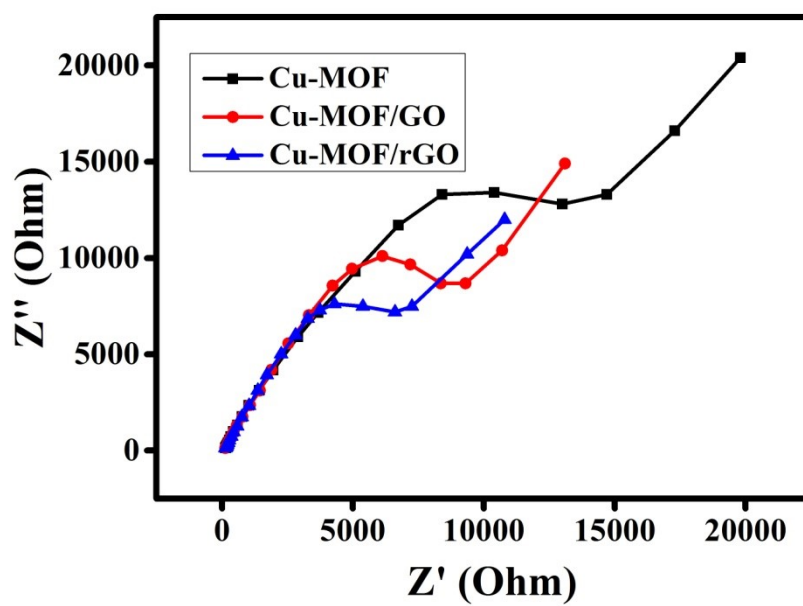

Figure S4. EIS of Cu-MOF, Cu-MOF/GO and Cu-MOF/rGO.

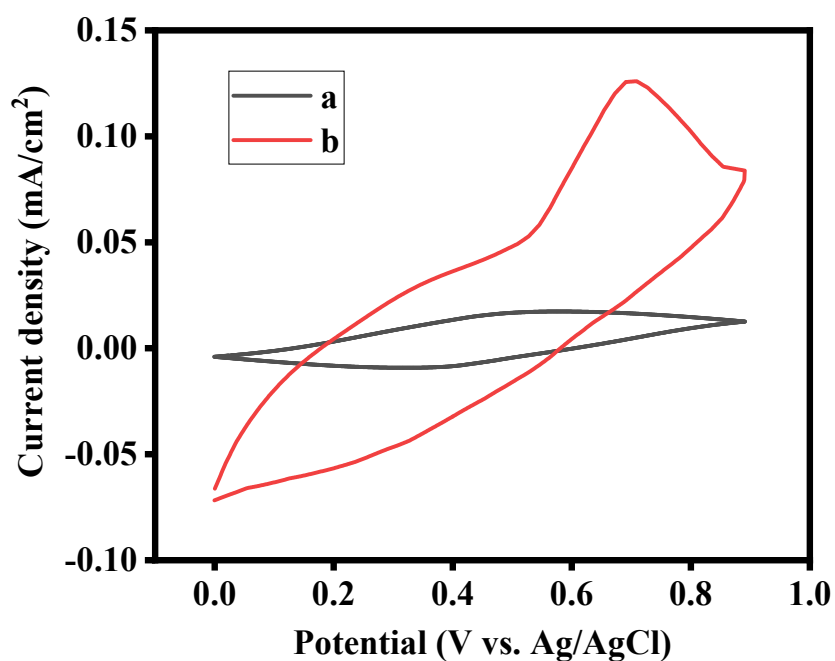

**Figure S5.** CV of Cu-MOF/rGO in the absence (a) and presence (b) of 100  $\mu\text{M}$  BPA in 0.1 M PBS (pH 7.4) at 50 mV/s.

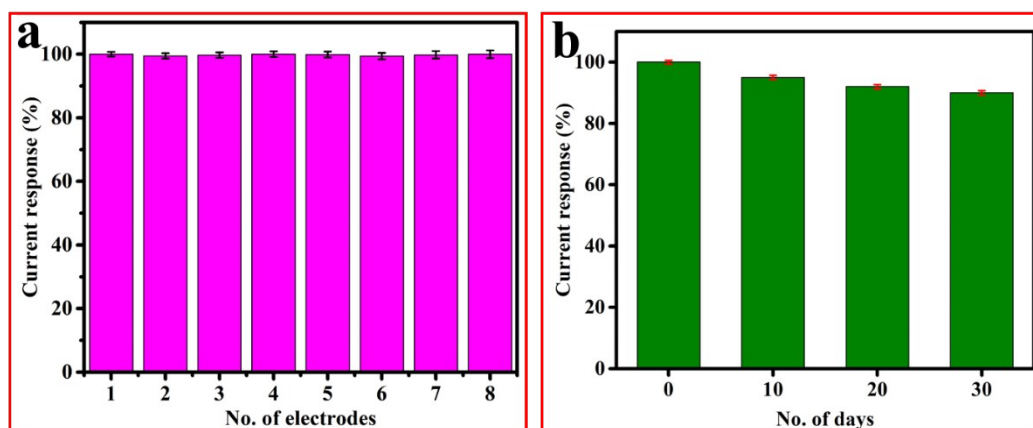

**Figure S6.** (a) Reproducibility study of Cu-BTABB-MOF@rGO on eight different electrodes and its current response, (b) Stability study of Cu-BTABB-MOF@rGO with 10 'days' time interval up to 30 days.

**Table S1.** Rate of recovery % and RSD % of real time analysis

| Sample         | BPA added ( $\mu\text{M}$ ) | Found ( $\mu\text{M}$ ) | Recovery (%) | RSD% |
|----------------|-----------------------------|-------------------------|--------------|------|
| Water sample 1 | 1                           | 1.057                   | 105.7        | 2.7  |
| Water sample 2 | 5                           | 5.043                   | 100.86       | 3.1  |
| Water sample 3 | 10                          | 10.082                  | 100.82       | 2.8  |

**Tab  
leS2**

.Comparison of the Present Cu BTABB-MOF/rGO Fabricated Sensor with the Reported Sensors Towards Electrochemical Sensing of Bisphenol A

| Modified electrode                                                                                                                 | Analyte | Linear Range                       | LOD                | References |
|------------------------------------------------------------------------------------------------------------------------------------|---------|------------------------------------|--------------------|------------|
| MWCNTs / $\beta$ -cyclodextrin ( $\beta\text{CD}$ )                                                                                | BPA     | 0.125 - 2 and 2 - 30 $\mu\text{M}$ | 13.76 nM           | <b>S1</b>  |
| Polyglutamic acid/amino-functionalized carbon nanotubes nanocomposite                                                              | BPA     | 0.1-10 $\mu\text{M}$               | 0.02               | <b>S2</b>  |
| Magnetic molecularly imprinted polymer (USMagMIP)/ nanocomposite of carbon black nanoparticles (CBNPs)/ Gold nanoparticles (AuNPs) | BPA     | 0.07-10 $\mu\text{M}$              | 8.8 nM and 31.5 nM | <b>S3</b>  |
| Platinum nanoparticles (DPNs) / gold nanoparticles / polyethyleneimine-phosphatidylcholine (PEI-PC) layer                          | BPA     | 0.01-1.0 and 1.0-300 $\mu\text{M}$ | 6.63 $\pm$ 0.77 nM | <b>S4</b>  |
| Cerium/centered metal-organic framework / reduced graphene oxide composite (Ce-MOF-ERGO)                                           | BPA     | 3 nM-10 $\mu\text{M}$              | 1.9 nM             | <b>S5</b>  |
| Ni/MOF@CNTs                                                                                                                        | BPA     | 0.001-1.0 $\mu\text{M}$            | 0.35 nM            | <b>S6</b>  |
| Ionic liquid functionalized graphene nanoplatelets                                                                                 | BPA     | 0.02-5.0 $\mu\text{M}$             | 6.4 $\mu\text{M}$  | <b>S7</b>  |

|                                                            |            |                              |                             |                  |
|------------------------------------------------------------|------------|------------------------------|-----------------------------|------------------|
| Copper-centered metal-organic framework (MOF)              | BPA        | 0.05-3.0 $\mu$ M             | 0.013 $\mu$ M               | <b>S8</b>        |
| Amine-functionalized MOF/reduced graphene oxide composites | BPA        | 2-200 $\mu$ M                | 0.7966 $\mu$ M              | <b>S9</b>        |
| Covalent organic framework CTpPa-2                         | BPA        | 0.1-50 $\mu$ M               | 0.02 $\mu$ M                | <b>S10</b>       |
| <b>Cu BTABB-MOF/rGO</b>                                    | <b>BPA</b> | <b>0-10<math>\mu</math>M</b> | <b>0.2<math>\mu</math>M</b> | <b>This work</b> |

## References

- [S1] M. Y. Ali, A. U. Alam and M. M. R. Howlader, *Sens. Actuators B: Chem.*, 2020, **320**, 128319.
- [S2] Y. Lin, K. Liu, C. Liu, L. Yin, Q. Kang, L. Li and B. Li, *Electrochim. Acta*, 2014, **133**, 492-500.
- [S3] N. B. Messaoud, A. A. Lahcen, C. Dridi and A. Amine, *Sens. Actuators B: Chem.*, 2018, **276**, 304-312.
- [S4] K. Shim, J. Kim, M. Shahabuddin, Y. Yamauchi, M. S. A. Hossain and J. H. Kim, *Sens. Actuators B: Chem.*, 2018, **255**, 2800-2808.
- [S5] X. Wang, Y. Shi, J. Shan, H. Zhou and M. Li, *Ionics*, 2020, **26**, 3135-3146.
- [S6] C. Xu, L. Liu, C. Wu and K. Wu, *Sens. Actuators B: Chem.*, 2020, **310**, 127885.
- [S7] P. Butmee, P., G. Tumcharern, P. Saejueng, D. Stankovic, A. Ortner, J. Jitcharoen, K. Kalcher and A. Samphao, *J. Electroanal. Chem.*, 2019, **833**, 370-379.
- [S8] X. Wang, X. Lu, L. Wu and J. Chen, *Biosens. Bioelectron.*, 2015, **65**, 295-301.
- [S9] J. Cheng, S. Chen, D. Chen, L. Dong, J. Wang, T. Zhang, T. Jiao, B. Liu, H. Wang, J. -J. Kai, D. Zhang, G. Zheng, L. Zhi, F. Kang and W. Zhang, *J. Mater. Chem. A*, 2018, **6**, 20254-20266.

[S10] Y. -H. Pang, Y. -Y. Huang, L. Wang, X. -F. Shen and Y. -Y. Wang, *Environ. Pollut.*, 2020, **263**, 114616.
